# Supplementary material for: Structural and mechanistic insights into the inhibition of respiratory syncytial virus polymerase by a non-nucleoside inhibitor
Source: PubMed Central journal article supplement (PMC10590419; doi:10.1038/s42003-023-05451-4), 2023-10-21
Supplement: 42003_2023_5451_MOESM1_ESM.pdf [file 42003_2023_5451_MOESM1_ESM.pdf]

## Methods

### Inhibition of HMPV and other viruses

#### *Human Metapneumovirus (HMPV) Assay*

The antiviral activity of compound JNJ-8003 against HMPV (recombinant CAN97-83-derived strain encoding GFP obtained from ViraTree) was tested in LLC-MK2 cells that were plated (375,000 cells/ml; 20  $\mu$ L) in black 384-well clear-bottom microtiter compound plates. Human metapneumovirus was added in culture medium supplemented with trypsin (5  $\mu$ g/mL) (MOI = 0.1; 20  $\mu$ L) using a multidrop dispenser. Three days post virus exposure, viral replication was quantified by measuring green fluorescent protein (GFP) fluorescence with a Tecan Infinite apparatus. In parallel, cytotoxicity was assessed in non-infected LLC-MK2 cells using adenosine triphosphate (ATP)-based bioluminescent readout (ATPLite™ 1step luminescence assay system; PerkinElmer).

#### *Parainfluenza Virus Type 1 (PIV-1) and Type 3 (PIV-3) Assays*

The antiviral activity of compound JNJ-8003 against PIV-1 (recombinant Washington/20993/1964-derived strain encoding GFP obtained from ViraTree) and PIV-3 (recombinant JS-derived strain encoding GFP obtained from ViraTree) was tested in LLC-MK2 cells that were seeded in black 384-well clear-bottom microtiter plates ( $3 \times 10^5$  cells/mL; 20  $\mu$ L) in medium supplemented with 2% FBS. PIV-1 and PIV-3 were added at an MOI of 0.01 in culture medium. Three days post virus exposure, viral replication and cytotoxicity were evaluated as described for HMPV assay.

#### *Vesicular Stomatitis Virus (VSV) Assay*

Inhibition of VSV replication by compound JNJ-8003 was assessed in A549 cells infected with a recombinant VSV (rVSV, Indiana strain-derived) harboring a luciferase reporter gene. In brief, A549 cells ( $3 \times 10^4$  cells/well) were seeded one day in advance, followed by a 1 hour incubation with a 5-fold serial dilution of JNJ-8003, before infection with rVSV. After 24h incubation, BrightGlo™ reagent (Promega Corporation) was added, and luciferase activity was measured using an Envision plate reader (Perkin Elmer). In parallel cytotoxicity was measured as described for HMPV assay.

### Methyltransferase activity assay

The methyltransferase activity was measured using a filter-binding assay, performed according

to the method described previously<sup>1</sup>. A 25 nM solution of RSV MTase-CTD protein or RSV L+P complex was incubated with 0.7  $\mu$ M or 1.8  $\mu$ M purified synthetic RNA 5'-Gppp GGGACAAAA (RSV9) for the MTase-CTD or L+P complex, respectively; 2  $\mu$ M or 0.17  $\mu$ M S-adenosyl methionine (SAM) for the MTase-CTD or L+P complex, respectively; and 0.1  $\mu$ M or 0.8  $\mu$ M <sup>3</sup>H-SAM (Perkin Elmer) for the MTase-CTD or L+P complex, respectively; in 50 mM Tris-HCl pH 8.0. Compounds, previously dissolved in DMSO were added at a final concentration of 50  $\mu$ M or 200  $\mu$ M. After 3 h incubation at 30°C, reactions were quenched by a 20-fold dilution in ice cold water. Samples were transferred to DEAE filtermats (Perkin Elmer) using a Filtermat Harvester (Packard Instruments). The RNA-retaining mats were washed twice with 10 mM ammonium formate pH 8.0, twice with water and once with ethanol. They were then soaked with scintillation fluid (Perkin Elmer), and <sup>3</sup>H-methyl transfer to the RNA substrates was determined using a Wallac MicroBeta TriLux Liquid Scintillation Counter.

## **Cellular polymerase assays**

### ***DNA-dependant DNA polymerase (DdDp) activity***

Human DNA polymerases alpha (CHIMERx) at 5 U/ml, beta (CHIMERx) at 0.5 U/ml and gamma (Abcam) at 0.1 mg/ml were incubated with the tested inhibitors at specified concentrations, and a reaction mix composed of 62  $\mu$ g/ml activated calf thymus DNA, dGTP (2  $\mu$ M), dATP (2  $\mu$ M), dCTP (2  $\mu$ M), [<sup>3</sup>H]dTTP (0.05  $\mu$ Ci/ $\mu$ l), 0.1 mg/ml BSA and a buffer composed of Tris-HCl pH 8 (50 mM), MgCl<sub>2</sub> (5 mM), KCl (60 mM), and DTT (4 mM.) in a total volume of 50  $\mu$ l. After 2 hours incubation at 30°C, reaction was terminated by addition of 60  $\mu$ l of a chilled stop solution composed of 20% (w/v) TCA with 0.5 mM ATP. After 1 hour incubation at 4°C, reaction mixture was transferred to 10% TCA (10  $\mu$ L) prewet filter plate and washed 3 times with cold 10% TCA and once cold 70% ethanol (200  $\mu$ L each). Radioactivity was measured via liquid scintillation counting (MicroScint-20, 40 $\mu$ l) on a TriLux apparatus.

### ***Mitochondrial RNA polymerase-DdRp activity***

The RNA transcription activity of human mitochondrial RNA polymerase (POLRMT) was measured by the incorporation of radioactively labeled nucleotides by POLRMT into acid-insoluble RNA products as described previously<sup>2</sup>. Each reaction mixture contained 10 mM Tris-HCl pH 7.4, 10 mM DTT, 10 mM MgCl<sub>2</sub>, 0.4 U/ $\mu$ L RNaseIn (Promega), 20 mM NaCl, 0.1 mg/mL BSA, 10 nM DNA template, 10 nM pAAAGA, 1.5  $\mu$ M ATP, 0.2  $\mu$ M GTP, 0.5  $\mu$ M CTP, 0.5  $\mu$ M tritiated UTP, 20 nM POLRMT and testing compound at various concentrations with 10

% DMSO in final reaction mixtures. The reaction mixtures were incubated for 2 hours at 30°C and were quenched with a cold mixture of 20% (w/v) TCA and 0.5 mM ATP. The quenched reactions were incubated at 4°C for at least 1 hour and then the reactions were loaded onto a 96-well filter plate (EMD Millipore) for filter plate-based radiometric analysis as described above for DdDp activity.

### ***RNA polymerase II-DdRp activity***

Reaction was prepared by mixing 75 ng of 1.2kb CMV promoter DNA template (Promega cat # E3621, Lot # 16611414) with 400 μM ATP, 400 μM GTP, 40 μM UTP, [ $\alpha$ -<sup>33</sup>P]CTP (0.53 μM), RNase inhibitor 24 U, 5.6 mM HEPES pH 7.9, 28 mM KCl, 56 μM EDTA, 140 μM DTT, 5.6% glycerol (Promega) and 4 μl of Promega HeLaScribe® Nuclear Extract (cat# E3062) together with the tested inhibitor in a total volume of 25 μl. After an incubation time of 30 min at 30°C, the reaction was stopped by addition of 25 μl of TSE buffer (10 mM Tris-CL, pH 8.0, 150 mM NaCl, EDTA 100 mM). Processing of samples included elution through a G-50 spin column (GE Healthcare), phenol-chloroform extraction, and ethanol precipitation. Air-dried RNA samples were reconstituted in 20 μL TBE urea gel loading buffer (BioRad), and migrated through a 6% TBE urea PAGE gel for 1 hour at 190 V. The gel was exposed to a phosphorscreen that was scanned with a Typhoon 9400 phosphorImager (GE Healthcare).

### **Thermal shift assays**

Prometheus NT.48 (NanoTemper GmbH, Munich, Germany) was used to determine the melting temperatures. 1 μM RSV L+P with 0.1% DMSO or with 25μM JNJ-8003 in Standard-grade glass capillaries were measured in temperature range 20–95° with a temperature gradient of 1°C/min. Intrinsic protein fluorescence at 330 and 350 nm was recorded and used for melting temperature calculations.

### **Surface plasmon resonance assay**

Purified recombinant RSV L+P complex (C-terminal 6x His-tag on the P protein) is captured via a nickel-Tris-NTA-biotin (SIGMA 75543) coated Biacore Series S streptavidin chip (Cytiva) activated with EDC/NHS (Cytiva BR10050, Amine Coupling Kit) to obtain immobilization levels of 8,000-9,000 RU. The surface was then deactivated using ethanolamine and subsequently blocked with PEG-biotin (Thermo Scientific 21346). The experiments were performed at 37°C, using a Biacore 8K+ (Cytiva) instrument in running buffer: 10mM HEPES,

300mM NaCl, 10mM MgCl<sub>2</sub>, pH 7.4, 5% Glycerol, 2% DMSO, 0.005% p20, 0.5mM TCEP. Compound JNJ-8003 was injected for 240s at 30  $\mu$ L/min followed by a dissociation phase of 6,000s. Compound JNJ-8003 was injected using the parallel kinetics mode with a 4-point 3-fold dilution series with a top concentration of 20 nM. Reference and buffer-blank subtracted data, from 4 separate runs on 2 independent protein surfaces, were analyzed with the Biacore 8K Evaluation Software and fit to a 1:1 Langmuir model to obtain  $K_D$ ,  $k_{on}$ , and  $k_{off}$  values and binding kinetics. GDP was injected using the parallel kinetics mode with a 6-point 2-fold dilution series with a top concentration of 1 mM.

### HDX-MS

The coverage maps for all RSV P+L was obtained from duplicate undeuterated controls as follows: 10  $\mu$ L of 1.2  $\mu$ M sample in Buffer B (20 mM HEPES, pH 7.5, 500mM NaCl, 5% glycerol, 1 mM TCEP) was diluted with 60 $\mu$ L of ice-cold quench (100 mM Glycine, 7.04M Guanidine-HCl, 20mM TCEP, pH 2.4) for 1 minute prior to dilution in 180  $\mu$ L dilution buffer (100 mM Glycine, 20 mM TCEP, pH 2.4). In addition, a single repeat of undeuterated control was performed with 10  $\mu$ L of 1.2  $\mu$ M sample in Buffer B diluted with 40  $\mu$ L of Buffer B, quenched with 50  $\mu$ L of ice-cold quench for 1 minute prior to dilution in 150  $\mu$ L dilution buffer. Samples were then injected into a Waters HDX nanoAcquity UPLC (Waters, Milford, MA) with in-line protease XIII/pepsin digestion (NovaBioAssays). Peptic fragments were trapped on an Acquity UPLC BEH C18 peptide trap and separated on an Acquity UPLC BEH C18 column. A 10min, 5% to 35% acetonitrile (0.1% formic acid) gradient at 60  $\mu$ L/m was used to elute peptides directly into a Waters Synapt G2-Si mass spectrometer (Waters, Milford, MA). HDMSE data were acquired with an IMS wave velocity of 600 m/s. High energy acquisition of product ions was performed with 20 to 30 V ramp trap CE and continuous lock mass (Leu-Enk) was acquired for mass accuracy correction. Peptides were identified using ProteinLynx Global Server 3.0.3 (PLGS) from Waters. Further filtering of 0.3 fragments per residue was applied in DynamX 3.0. For the apo and ligand bound states, the HD exchange reactions and controls were acquired using a LEAP-autosampler controlled by Chronos software. The reactions were performed as follows: 10 $\mu$ L of 1.2 $\mu$ M protein was incubated in 40 $\mu$ L of Buffer B, 99.99% D<sub>2</sub>O, pD 7.5. All reactions were performed at 25°C. Prior to injection, deuteration reactions were quenched at various times (10 s, 100 s and 1000 s) with 50  $\mu$ L of ice-cold quench, incubated for 1 minute then diluted with 150 $\mu$ L of dilution. All deuteration time points were acquired in duplicates. The deuterium uptake

for all identified peptides as a function of increasing deuteration time was determined using Waters DynamX 3.0 software. Deuterium uptake difference plots,  $\Delta Dt$  (Apo–Ligand bound), displaying the difference in percent deuteration between the unbound and each ligand bound states for all identified peptides, at all deuterium incubation times probes were generated. 95% Confidence intervals for the  $\Delta Dt$  plots were determined and used to assign peptides with statistically significant differences in deuterium uptake between pair-wise states.

## SUPPLEMENTARY TABLES

**Supplementary Table 1: Antiviral activity of JNJ-8003 in cellular and polymerase assays**

| RSV strain/<br>Cell line <sup>a</sup>   | Median EC <sub>50</sub><br>(nM) | IQR <sup>f</sup> (nM) | n <sup>g</sup>       | Median CC <sub>50</sub><br>(nM) | IQR (nM)              | n <sup>g</sup> | SI <sup>h</sup> |
|-----------------------------------------|---------------------------------|-----------------------|----------------------|---------------------------------|-----------------------|----------------|-----------------|
| rgRSV224/<br>HeLa                       | 0.78                            | [0.55-1.26]           | 23                   | 27,000                          | [23,000-<br>35,000]   | 24             | 34,000          |
| RSV subgroup/<br>Cell line <sup>b</sup> | Median EC <sub>50</sub><br>(nM) | Subgroup IQR          | Number of<br>strains |                                 |                       |                |                 |
| A/HeLa                                  | 0.18                            | [0.70-0.22]           | 10                   |                                 |                       |                |                 |
| B/HeLa                                  | 0.10                            | [0.78-0.19]           | 6                    |                                 |                       |                |                 |
| Replicon<br>cell line <sup>c</sup>      | Median EC <sub>50</sub><br>[nM] | IQR <sup>f</sup> (nM) | n <sup>g</sup>       | Median CC <sub>50</sub><br>[nM] | IQR <sup>f</sup> (nM) | n <sup>g</sup> | SI <sup>h</sup> |
| APC-126                                 | 0.15                            | [0.12-0.16]           | 24                   | 11,000                          | [10,000-<br>13,000]   | 17             | 73,000          |
| RSV polymerase <sup>d</sup>             | Median IC <sub>50</sub> (nM)    | IQR <sup>f</sup> (nM) | n <sup>g</sup>       |                                 |                       |                |                 |
| RSV L+P RdRp                            | 0.73                            | [0.58-0.88]           | 18                   |                                 |                       |                |                 |
| Host polymerase <sup>e</sup>            | IC <sub>50</sub> (μM)           |                       |                      |                                 |                       |                |                 |
| DNA Pol α                               | >100                            |                       |                      |                                 |                       |                |                 |
| DNA Pol β                               | >100                            |                       |                      |                                 |                       |                |                 |
| DNA Pol γ                               | >100                            |                       |                      |                                 |                       |                |                 |
| POLRMT                                  | >100                            |                       |                      |                                 |                       |                |                 |
| RNA Pol II                              | >100                            |                       |                      |                                 |                       |                |                 |

<sup>a</sup>HeLa cell-based infection assay using rgRSV224 reporter strain. <sup>b</sup>HeLa cell-based infection assay using RSV A and B clinical isolates and laboratory strains quantified by RT-qPCR. <sup>c</sup>BHK-derived cell line (APC-126) containing a stable RSV replicon. <sup>d</sup>RSV L+P primer extension assay testing RNA-dependent RNA polymerase (RdRp) activity. <sup>e</sup>Human DNA polymerase alpha, beta, and gamma, human mitochondrial RNA polymerase (POLRMT), and Human RNA polymerase II. <sup>f</sup>Interquartile range (IQR). <sup>g</sup>Number of inter-assay independent repeats (n). <sup>h</sup>Selectivity Index (CC<sub>50</sub>/EC<sub>50</sub>).

**Supplementary Table 2: Antiviral activity of JNJ-8003 against a panel of RNA Viruses other than RSV**

| <b>Virus</b> | <b>Genome Type</b> | <b>Virus Family</b>    | <b>Strain</b>                      | <b>Cells</b> | <b>Median EC<sub>50</sub> (μM)</b> | <b>Median CC<sub>50</sub> (μM)</b> | <b>SI</b> |
|--------------|--------------------|------------------------|------------------------------------|--------------|------------------------------------|------------------------------------|-----------|
| <b>HMPV</b>  | ssRNA (-)          | <i>Pneumoviridae</i>   | CAN97-83 <sup>a</sup>              | LLC-MK2      | 0.088                              | 14                                 | 160       |
| <b>PIV-1</b> | ssRNA (-)          | <i>Paramyxoviridae</i> | Washington/20993/1964 <sup>a</sup> | LLC-MK2      | 13                                 | 18                                 | 1.4       |
| <b>PIV-3</b> | ssRNA (-)          | <i>Paramyxoviridae</i> | JS <sup>a</sup>                    | LLC-MK2      | 11                                 | 19                                 | 1.7       |
| <b>VSV</b>   | ssRNA (-)          | <i>Rhabdoviridae</i>   | Indiana <sup>a</sup>               | A549         | >25                                | >25                                | NC        |

<sup>a</sup>Original genome background used to generate recombinant reporter strain. EC<sub>50</sub>: effective concentration for 50 % inhibition. CC<sub>50</sub>: 50% cytotoxic concentration. SI: selectivity index (CC<sub>50</sub>/EC<sub>50</sub>). NC: not calculable (undetermined). NA: not applicable because any sign of activity was associated with toxicity.

**Supplementary Table 3: Resistance mutations in the RSV L protein upon JNJ-8003 drug pressure.**

| Selection line |                                            |             |                                            |
|----------------|--------------------------------------------|-------------|--------------------------------------------|
| 1              |                                            | 2           |                                            |
| Mutation(s)    | Passages of appearance (days of selection) | Mutation(s) | Passages of appearance (days of selection) |
| C1388G         | 1 (11) to 10 (70)                          | R526W       | 1 (73) to 10 (222)                         |
|                |                                            | R999G       | 1 (73) to 10 (222)                         |
|                |                                            | D1026N      | 6 (164) to 7 (179)                         |
|                |                                            | I1381S      | 6 (164) to 7 (179)                         |
|                |                                            | Y1361F      | 8 (194) to 10 (222)                        |

Kinetics of mutation appearances were studied by full genome next generation sequencing. 3 independent lines of selection were conducted with rgRSV224 at a constant compound pressure of 3 nM (1×EC90). A passage was performed when >90% of cells appeared to be infected (GFP+). Dominant (>50% frequency) mutations located in the RSV L protein are shown. Mutation(s) occurring more than once at the same position are highlighted in bold.

**Supplementary Table 4: Shift in potency of virus with resistance substitutions in the RSV L protein selected upon JNJ-8003 drug pressure**

|                  | Replicates   |                |                          |
|------------------|--------------|----------------|--------------------------|
|                  | 1            | 2              |                          |
| <b>Mutations</b> | C1388G       | R526W<br>R999G | R526W<br>R999G<br>Y1361F |
| <b>Ribavirin</b> | <b>5.7</b>   | 0.7            | 0.3                      |
| <b>BI-D</b>      | 1.2          | 0.3            | 0.1                      |
| <b>AZ-27</b>     | <b>7.8</b>   | 2.0            | 2.6                      |
| <b>JNJ-8003</b>  | <b>253.0</b> | 3.3            | <b>9.9</b>               |

Pools of passaged virus containing dominant (>50% frequency) mutations in the RSV L protein were plaque-purified to obtain pure mutant stocks. The potency of JNJ-8003 as well as reference RSV L inhibitors was tested on these purified stocks in HeLa cells. The shift in potency versus wild-type rgRSV224 virus was calculated and is shown in the table above. Shifts higher than 4x are displayed in bold.



Supplementary Table 5: NMR assignments of JNJ-8003 in DMSO-d6 at 298 K

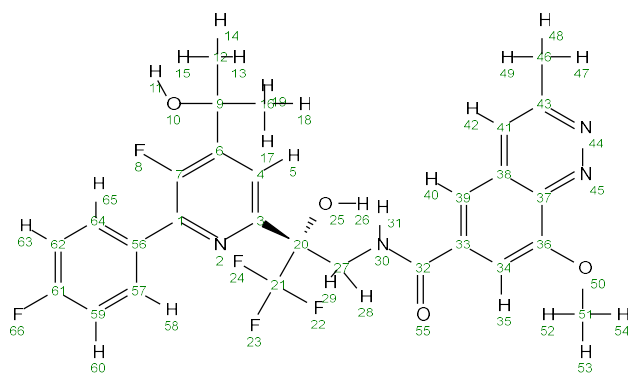

| <sup>13</sup> C Atom | Chemical Shift (δ ppm) | <sup>1</sup> H Atom | Chemical Shift (δ ppm); multiplicity, <i>J</i> Coupling (Hz) |
|----------------------|------------------------|---------------------|--------------------------------------------------------------|
| 1                    | 142.13                 | 5                   | 8.12; d, 5.3 Hz                                              |
| 3                    | 151.22                 | 11                  | 5.68; s                                                      |
| 4                    | 119.91                 | 13,14,15            | 1.55; s                                                      |
| 6                    | 146.93                 | 17,18,19            | 1.48; s                                                      |
| 7                    | 153.45                 | 26                  | 7.30; s                                                      |
| 9                    | 69.33                  | 28,29               | 4.26,4.14; dd, 14.0, 6.3 Hz; dd, 14.0, 5.7 Hz                |
| 12                   | 29.34                  | 31                  | 8.79; dd, 6.3, 5.7 Hz                                        |
| 16                   | 29.18                  | 35                  | 7.39; d, 1.6 Hz                                              |
| 20                   | 76.87                  | 40                  | 7.78; d, 1.5 Hz                                              |
| 21                   | –                      | 42                  | 7.93; s                                                      |
| 27                   | 43.69                  | 47,48,49            | 2.86; s                                                      |
| 32                   | 166.91                 | 52,53,54            | 4.06; s                                                      |
| 33                   | –                      | 58,65               | 7.99; m                                                      |
| 34                   | 105.89                 | 60,63               | 7.35; m                                                      |
| 36                   | 155.52                 |                     |                                                              |
| 37                   | 141.55                 |                     |                                                              |
| 38                   | 126.30                 |                     |                                                              |
| 39                   | 117.49                 |                     |                                                              |
| 41                   | 121.52                 |                     |                                                              |
| 43                   | 154.88                 |                     |                                                              |
| 46                   | 21.29                  |                     |                                                              |
| 51                   | 55.77                  |                     |                                                              |
| 56                   | 131.03                 |                     |                                                              |
| 57                   | 131.03                 |                     |                                                              |
| 59                   | 115.24                 |                     |                                                              |
| 61                   | 162.55                 |                     |                                                              |
| 62                   | 115.24                 |                     |                                                              |
| 64                   | 131.03                 |                     |                                                              |

**Supplementary Table 6: NOE correlations and inter-proton distances (Å) calculated from 2D EASY-ROESY (DMSO-d6).**

| Atom 1   | Atom 2   | Normalized integral | Corrected integral | Calculated distance (Å) |
|----------|----------|---------------------|--------------------|-------------------------|
| 42       | 40       | 31.0                | 31.0               | 2.5*                    |
| 42       | 11       | 0.5                 | 0.5                | 5.1                     |
| 42       | 17,18,19 | 0.5                 | 0.2                | 6.0                     |
| 40       | 31       | 30.3                | 30.3               | 2.5                     |
| 40       | 5        | 1.4                 | 1.4                | 4.2                     |
| 40       | 58,65    | 1.0                 | 0.5                | 5.0                     |
| 40       | 26       | 0.8                 | 0.8                | 4.6                     |
| 40       | 17,18,19 | 0.7                 | 0.2                | 5.7                     |
| 31       | 28,29    | 25.8                | 12.9               | 2.9                     |
| 31       | 26       | 10.0                | 10.0               | 3.0                     |
| 5        | 26       | 17.1                | 17.1               | 2.8                     |
| 5        | 31       | 1.4                 | 1.4                | 4.2                     |
| 5        | 11       | 28.0                | 28.0               | 2.5                     |
| 5        | 28,29    | 3.3                 | 1.7                | 4.2                     |
| 5        | 13,14,15 | 3.8                 | 1.3                | 4.3                     |
| 5        | 17,18,19 | 4.0                 | 1.3                | 4.2                     |
| 58,65    | 31       | 1.1                 | 1.1                | 4.4                     |
| 58,65    | 28,29    | 2.5                 | 1.3                | 4.4                     |
| 58,65    | 26       | 0.5                 | 0.5                | 5.0                     |
| 35       | 31       | 28.4                | 28.4               | 2.5                     |
| 35       | 13,14,15 | 0.2                 | 0.1                | 7.2                     |
| 35       | 17,18,19 | 0.4                 | 0.1                | 6.3                     |
| 60,63    | 42       | 0.9                 | 0.9                | 4.5                     |
| 26       | 31       | 12.6                | 12.6               | 2.9                     |
| 11       | 52,53,54 | 0.6                 | 0.2                | 5.8                     |
| 52,53,54 | 17,18,19 | 0.4                 | 0.1                | 6.3                     |
| 17,18,19 | 35       | 0.2                 | 0.2                | 5.7                     |

\* Reference distance.

**Supplementary Table 7: Panel of RSV clinical isolates and laboratory strains**

| <i>Subgroup</i> | <i>Strain designation</i> | <i>Origin</i>   | <i>Date of isolation</i> |
|-----------------|---------------------------|-----------------|--------------------------|
| <i>A</i>        | Long                      | USA             | 1956                     |
|                 | A2                        | Australia       | 1961                     |
|                 | rgRSV224                  | Australia       | 1961                     |
|                 | Memphis 37                | USA             | 2001                     |
|                 | CI25                      | The Netherlands | 2001                     |
|                 | 07-041911                 | The Netherlands | 2007                     |
|                 | 09-000457                 | The Netherlands | 2009                     |
|                 | 11-014288                 | The Netherlands | 2011                     |
|                 | 12-049454                 | The Netherlands | 2012                     |
|                 | 13-010381                 | The Netherlands | 2013                     |
| <i>B</i>        | cl08                      | USA             | 2000                     |
|                 | 423                       | The Netherlands | 2007                     |
|                 | 03-034613                 | The Netherlands | 2003                     |
|                 | 05-036549                 | The Netherlands | 2005                     |
|                 | 11-050703                 | The Netherlands | 2011                     |
|                 | 13-013576                 | The Netherlands | 2013                     |

**Supplementary Table 8: RSV-A, RSV-B and  $\beta$ -actin RT-qPCR Primers and Probes**

| <b>Name</b>            | <b>Sequence</b>                              |
|------------------------|----------------------------------------------|
| RSV-A forward primer 1 | 5'-GCCAATCCTCAAAACAAAT-3'                    |
| RSV-A forward primer 2 | 5'-CCAATCCTCAAAGCAAATG-3'                    |
| RSV-A reverse primer 1 | 5'-AGATAGCCTTTGCTAACTG-3'                    |
| RSV-A probe 1          | 5'-6-FAM/CTATTACCA/ZEN/CAATCCTTGCT/3'IABkFQ  |
| RSV-A probe 2          | 5'-6-FAM/CAATTACCA/ZEN/CAATCCTTGCT/3'IABkFQ/ |
| RSV-A probe 3          | 5'-6-FAM/AATTACCAC/ZEN/AATCCTCGCTG/3'IABkFQ/ |
| RSV-B forward primer 1 | 5'-TGCTGATCCATAGATCAA-3'                     |
| RSV-B forward primer 2 | 5'-TGCTGGTCCATAGATCAA-3'                     |
| RSV-B forward primer 3 | 5'-GCTGATCCACAGGTTAAG-3'                     |
| RSV-B reverse primer 1 | 5'-CTCTGCTAACTGCACTAC-3'                     |
| RSV B probe 1          | 5'-HEX/CCTCAAGTC/ZEN/AGAACATAACTG/3'IABkFQ/  |
| b-actin forward primer | 5'-GGCCAGGTCATCACCATT-3'                     |
| b-actin reverse primer | 5'-ATGTCCACGTCACACTTCATG-3'                  |
| b-actin probe          | 5'-Cy5/TTCCGCTGC/TAO/CCTGAGGCTCTC/3'IAbRQSp/ |

**SUPPLEMENTARY FIGURES**

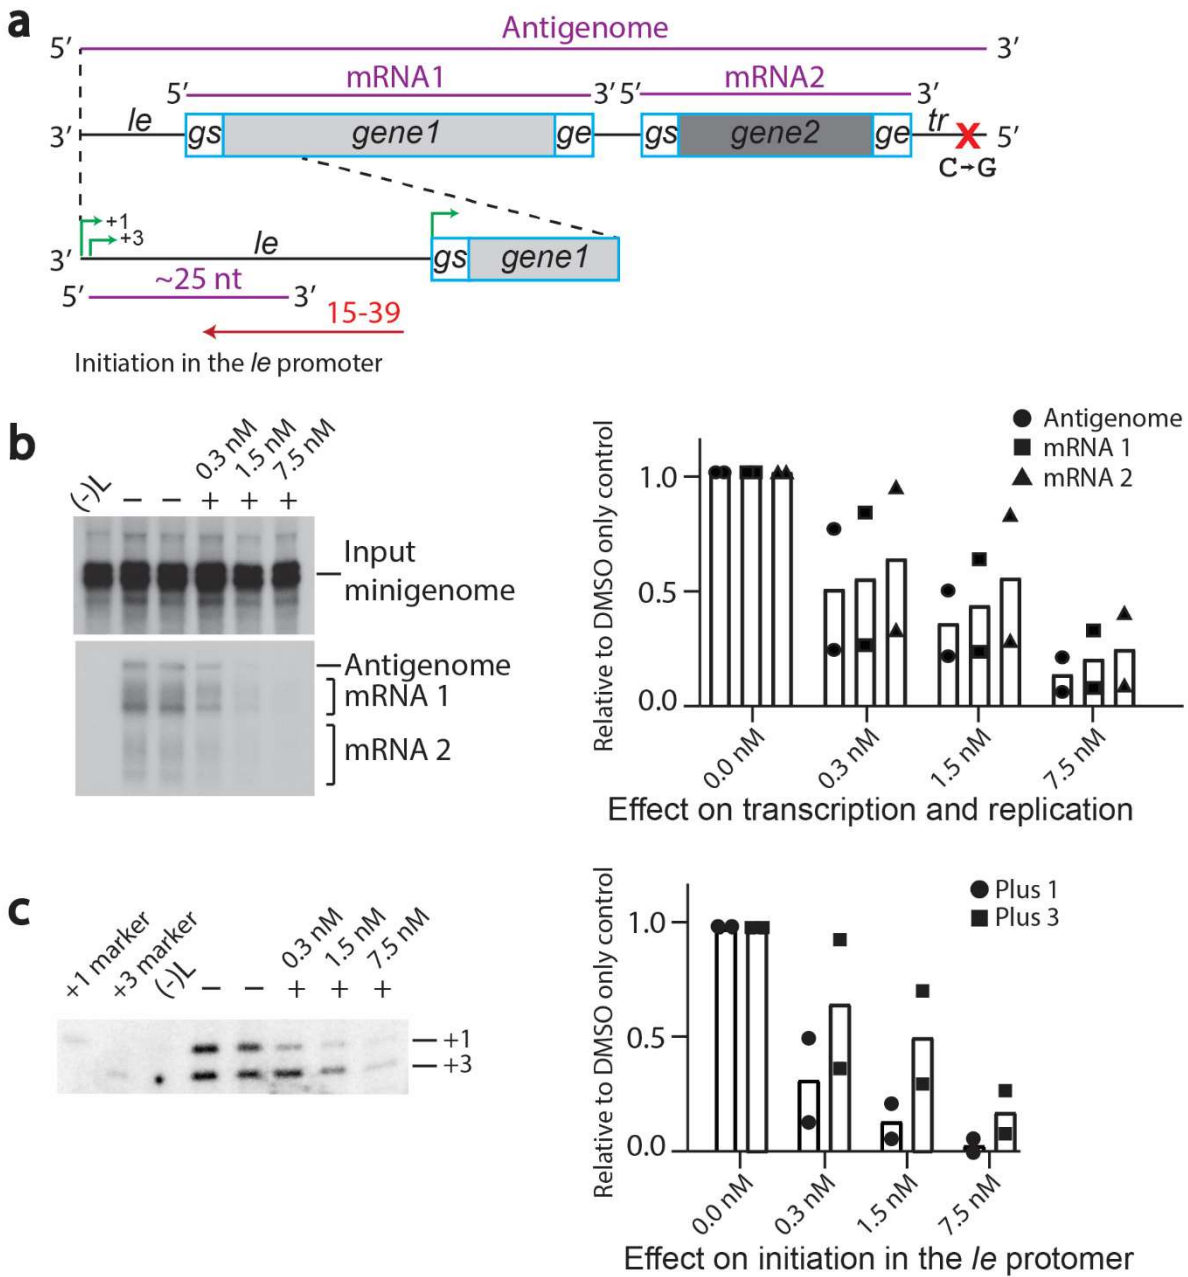

**Supplementary Figure 1: Effect of JNJ-8003 on RSV RNA replication and transcription in a minigenome assay. a.** Schematic diagram of the RSV minigenome and its RNA products (in purple). The +1 and +3 initiation sites within the *le* promoter (green arrows), and the 15-39 used in the primer extension reaction (red arrows) are shown. **b.** effect of JNJ-8003 on transcription (mRNA 1 and 2) and replication (antigenome). **c.** effect of JNJ-8003 on RNA synthesis in the *le* promoter initiated at +1 and +3. Bars indicate the mean, and data points from two independent experiments are shown. Data points are in Supplementary Data 11, 12.

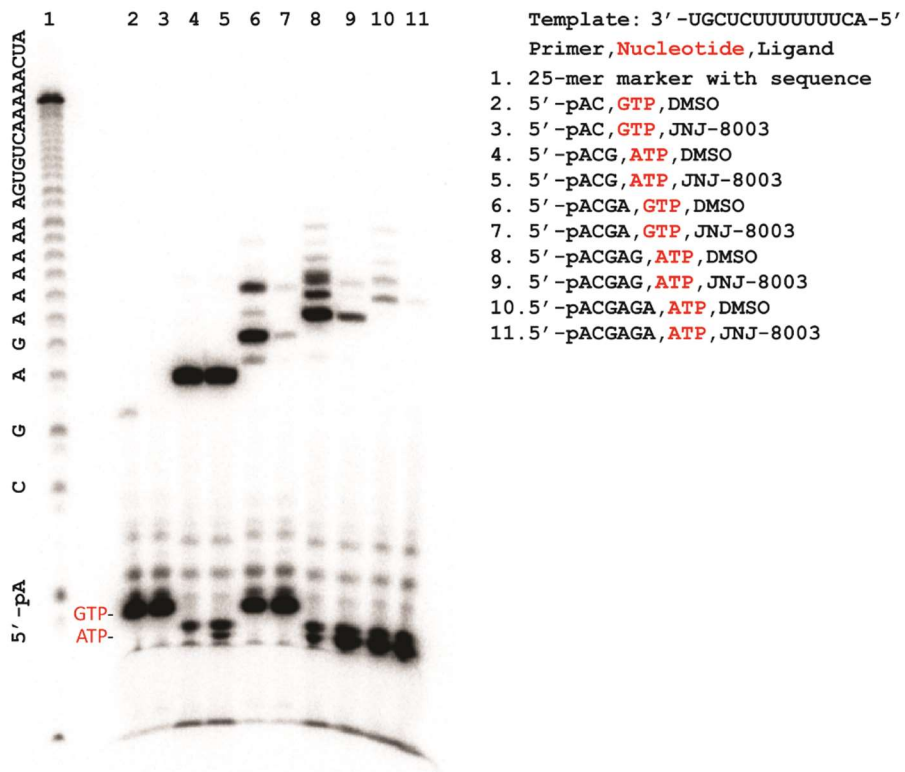

**Supplementary Figure 2: Effect of JNJ-8003 on primer extension (RNA synthesis from +1 site) with Tr-14 template.** Sequencing gel showing primer extension from a set of short primers with or without JNJ-8003.

**a** Primer extension with Le-11 Template

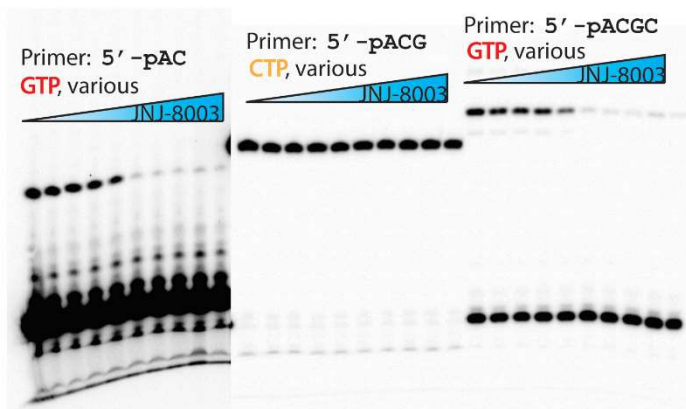

**b**

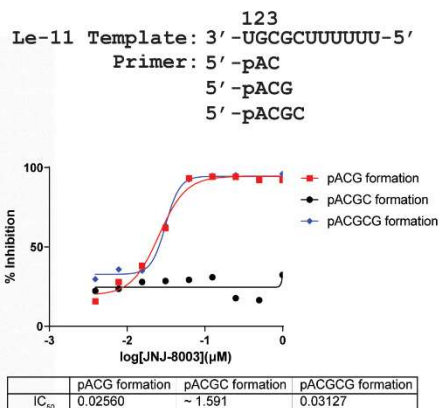

**c** Primer extension with Tr-14 Template

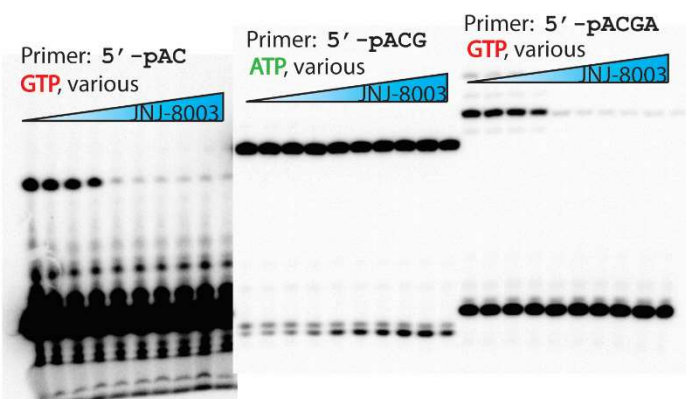

**d**

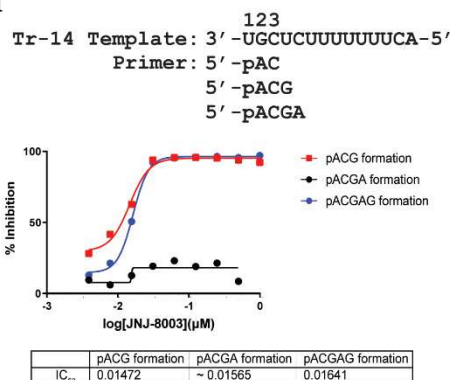

**e** Primer extension with Le-11 Template (from +3 position)

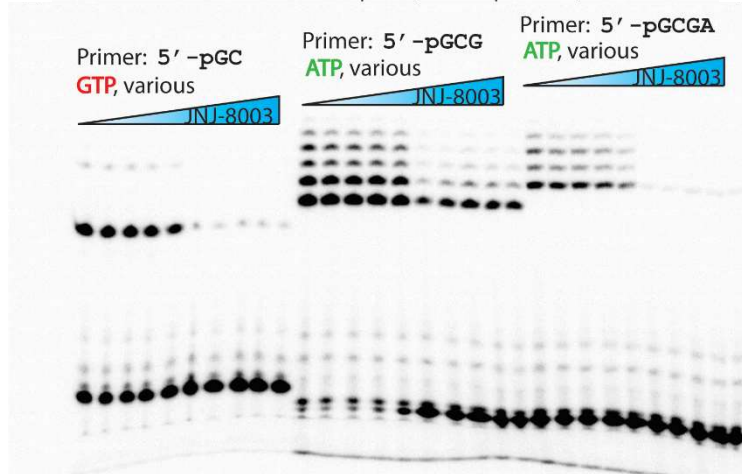

**f**

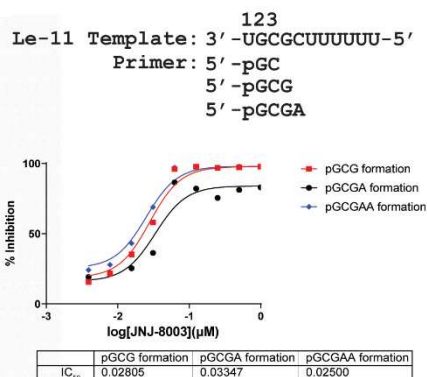

**Supplementary Figure 3: Effect of JNJ-8003 on primer extension using 2-mer, 3-mer, and 4-mer primers, with Le-11 template for +1 site RNA synthesis in **a**, with Tr-14 template for +1 site RNA synthesis in **c**, and Le-11 template for +3 site RNA synthesis in **e**. Respective quantifications from gel images are in **b**, **d**, and **f**.**

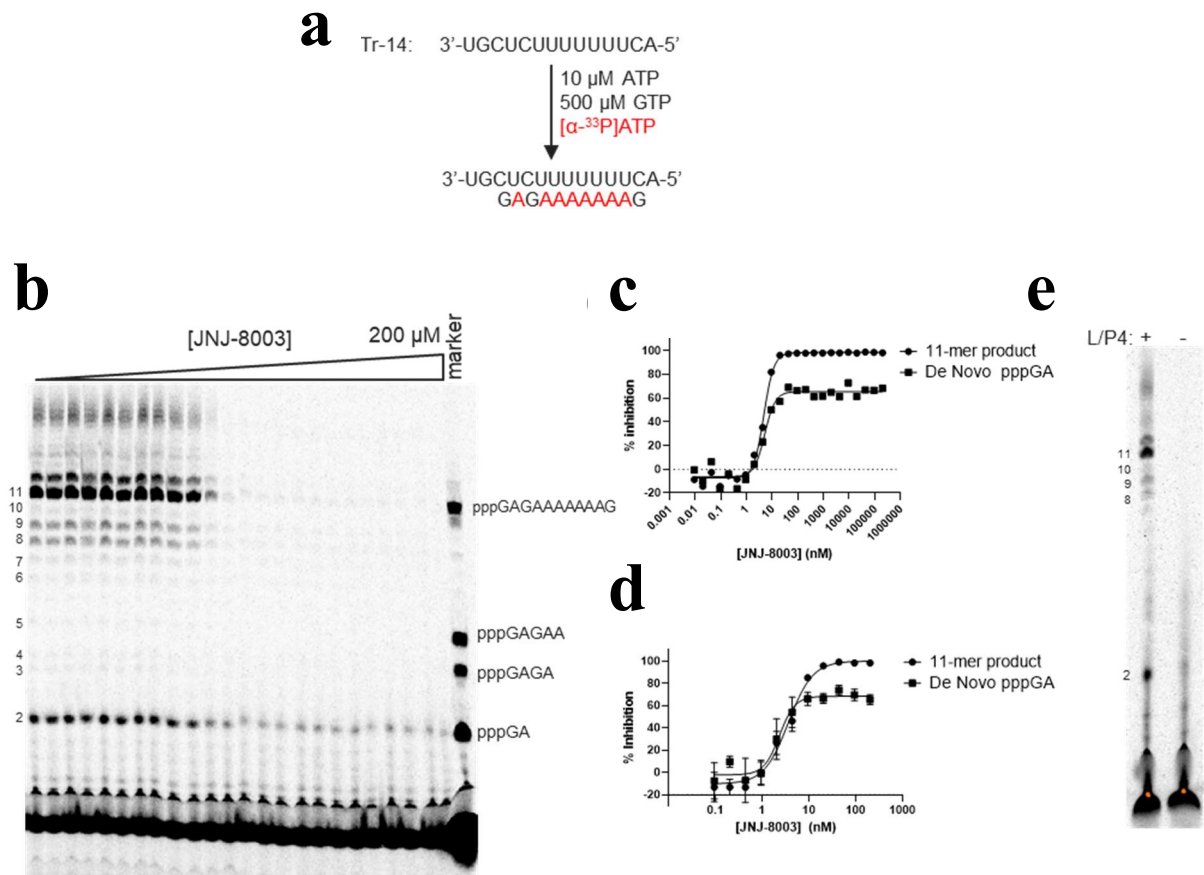

**Supplementary Figure 4. Inhibition of de novo initiation and extension of RSV L-P RNA synthesis by JNJ-8003.** **a.** reaction scheme. **b.** a sequencing gel image showing RNA products synthesized by RSV L-P at various JNJ-8003 concentrations (9.3 pM to 200 μM). The reactions contained 10 nM RSV L-P, 2 μM RNA template (Tr14), 500 μM GTP, 10 μM ATP, 170 nM [α-<sup>33</sup>P]ATP, so RNA synthesis started from +3 site and paused with a major 11-mer product. **c.** Inhibition of de novo pppGpA formation exhibited an IC<sub>50</sub> of 5.1 nM with a maximal inhibition of 65 %, whereas inhibition of 11-mer product exhibited an IC<sub>50</sub> of 4.7 nM with a maximal inhibition of 99 %. Data was from the quantitation results of the gel image in **b**. **d.** The reactions were repeated in triplicate at narrower concentration range of JNJ-8003 (0.093 nM to 200 nM). Inhibition of de novo pppGpA formation exhibited an IC<sub>50</sub> of 2.3 nM with a maximal inhibition of 69 %; whereas inhibition of 11-mer product exhibited an IC<sub>50</sub> of 3.6 nM with a maximal inhibition of 100%. Data points indicate the mean, and error bars depict the SD of three technical replicates. **e.** a sequencing gel image showing RNA products synthesized by RSV L-P along with no enzyme control. Reaction condition was same as in **b** with no compound added.

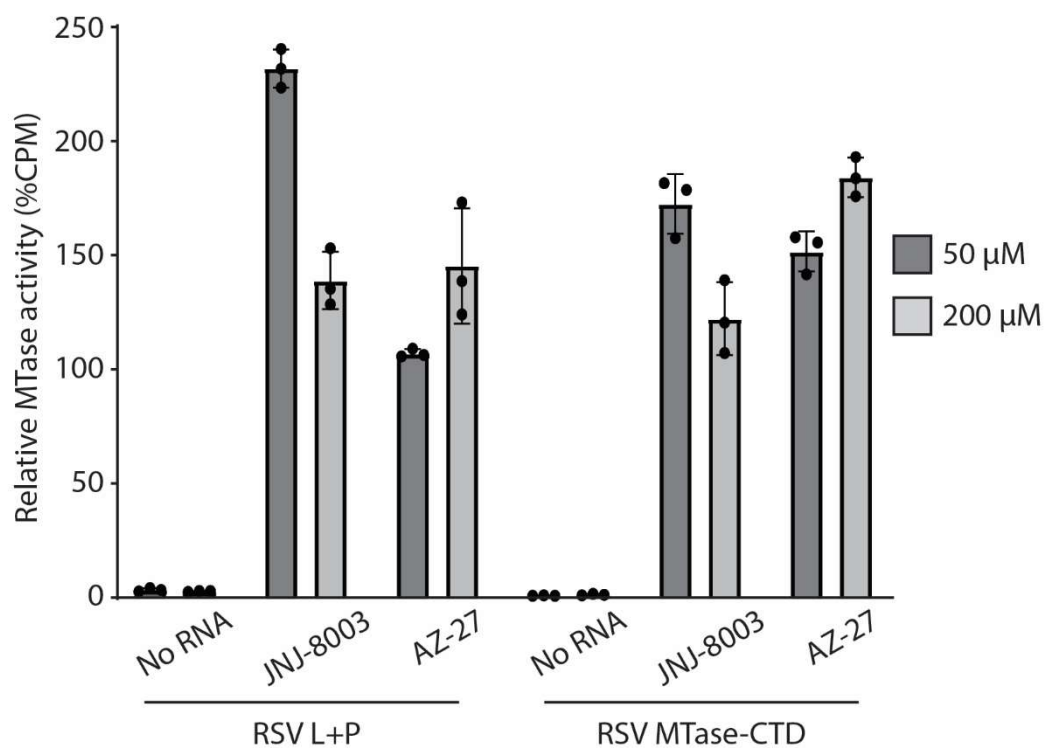

**Supplementary Figure 5. Effect of JNJ-8003 on MTase activity of RSV L+P complex and RSV MTase-CTD protein.** Transfer of tritiated methyl groups from S-adenosyl methionine (SAM) molecules to a synthetic 9-mers length RNA (Gppp RSV9) that mimics the 5' end of RSV mRNA was measured using a filter-binding assay. Control reactions were prepared with proteins and without RNA. The relative MTase activity values were normalized to the activity obtained with Gppp RSV9 counts per minute (CPM) without addition of inhibitor. Compounds were added to 50  $\mu$ M or 200  $\mu$ M final concentration. AZ-27 is a reference compound. Bars indicate the mean, and error bars depict the SD of three technical replicates. Data points are in Supplementary Data 13.



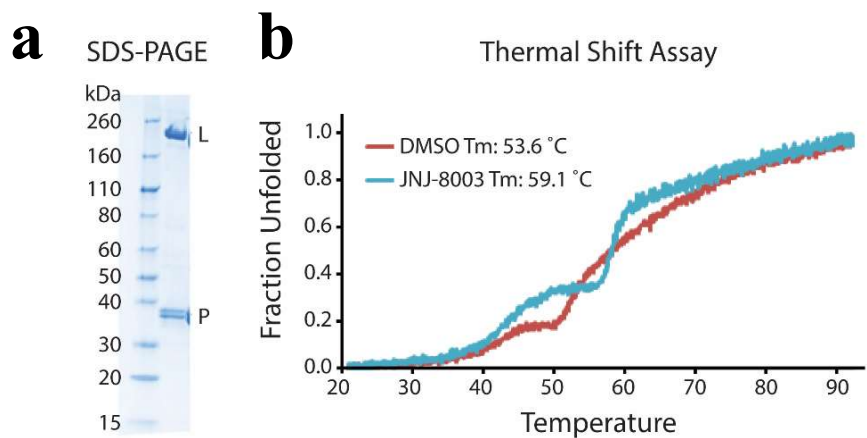

**Supplementary Figure 6: Stabilization of RSV L+P by JNJ-8003 in a Thermal Shift Assay.** **a.** SDS-PAGE of the purified RSV L+P complex. **b.** Representative melting curves of purified RSV L+P complex in the presence of DMSO or JNJ-8003. The melting temperatures (T<sub>m</sub>) were indicated in the table.

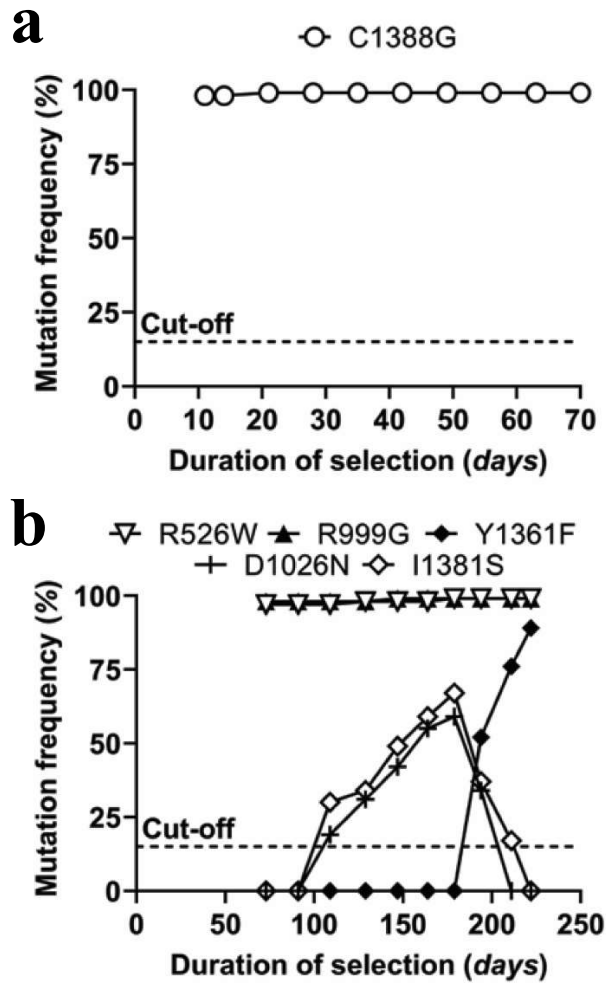

**Supplementary Figure 7: Kinetics of RSV L protein mutations arising *in vitro* upon drug pressure with JNJ-8003.** The appearance of resistance mutations resulting in the indicated amino acid substitutions was studied using whole genome next generation sequencing (cut-off value: 15%). 2 independent lines of selection (a, and b) were conducted in parallel using rgRSV224 a recombinant virus with a GFP reporter gene<sup>3</sup>, at a constant antiviral pressure of 3 nM (1×EC90). Data points are the frequencies of individual mutation for each culture passages which were analyzed when the culture reached >90% RSV<sup>+</sup> cells (GFP<sup>+</sup>).

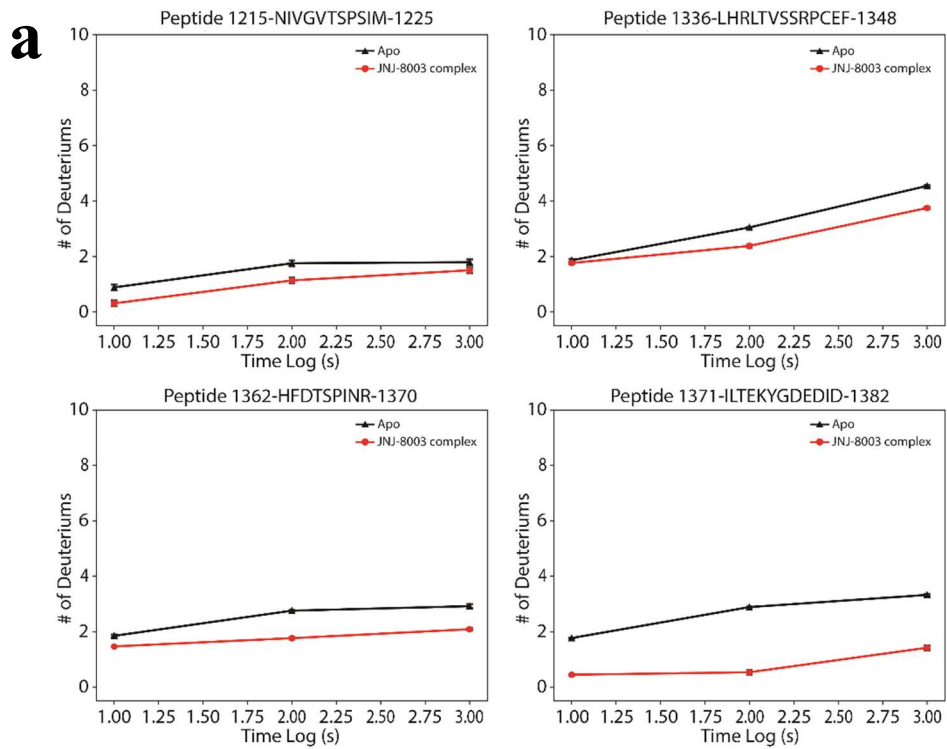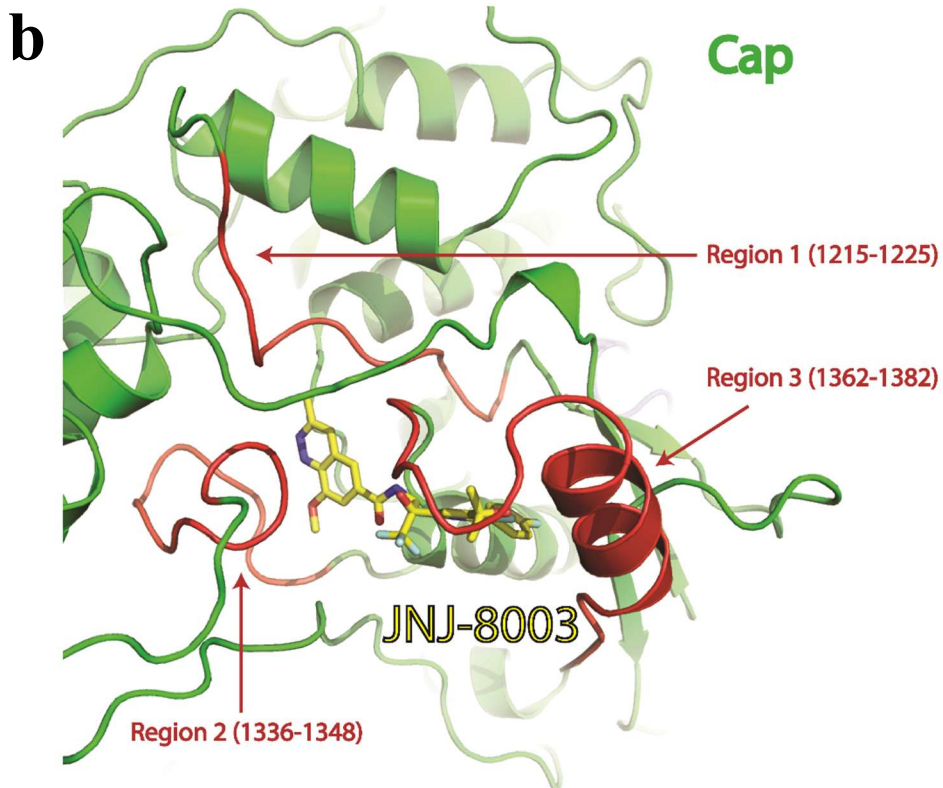

**Supplementary Figure 8. HDX and targeted amino-acid foot printing result of JNJ-8003 binding to RSV L+P. a.** Representative HDX kinetic plots: black represents unbound state; red represents JNJ-8003 bound state. **b.** The protected regions upon JNJ-8003 binding are mapped on the Cap domain (cartoon representation) and colored in red.

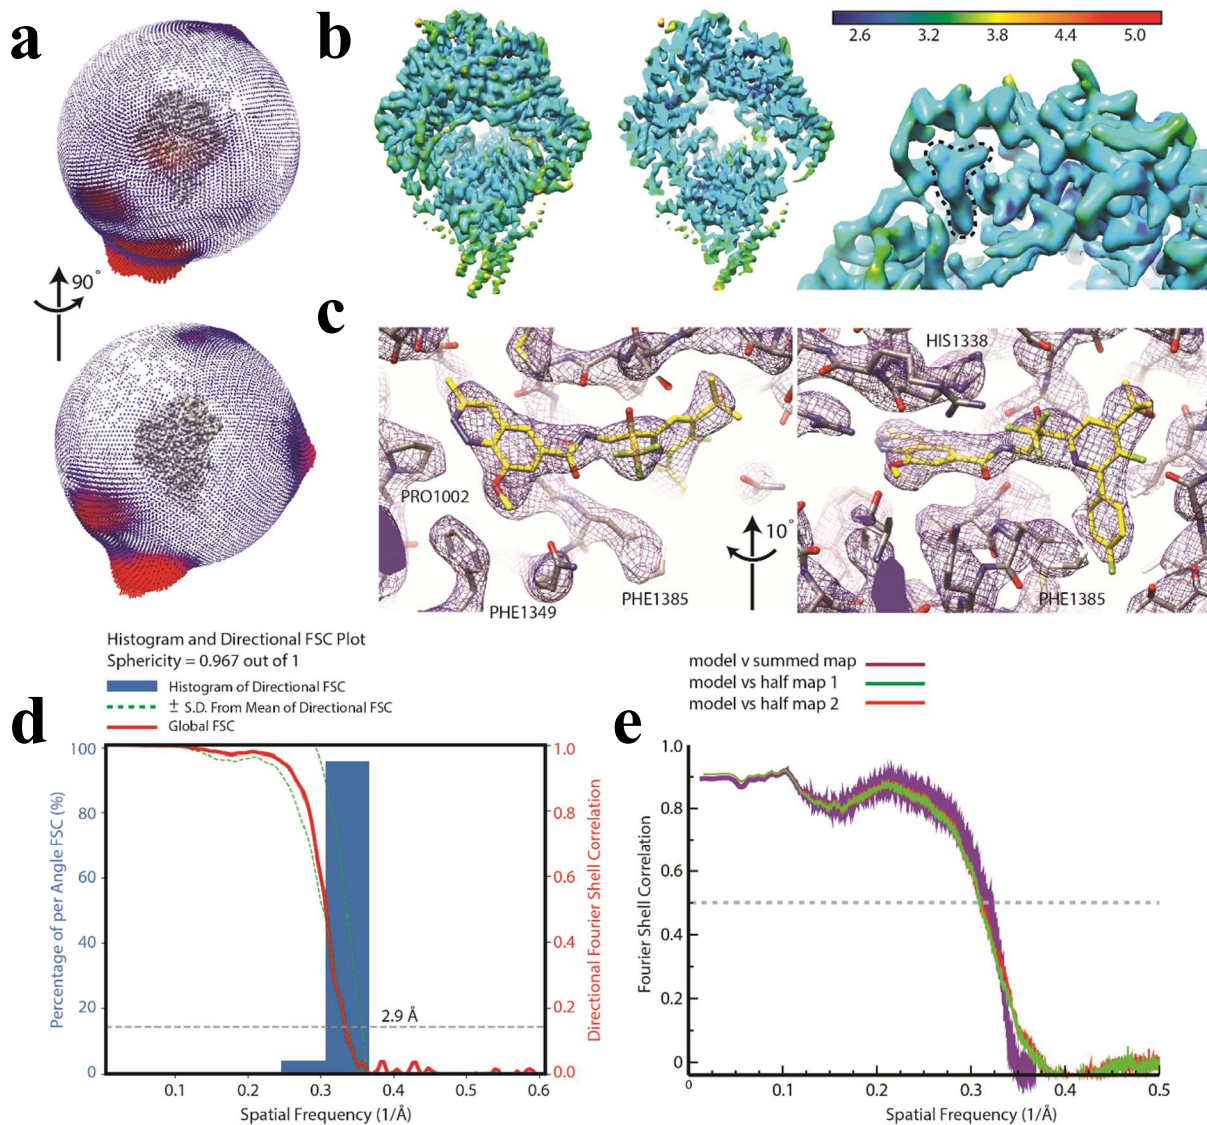

**Supplementary Figure 9: Cryo-EM analysis of RSV L+P complex with JNJ-8003. a.** Angular orientation distribution of the particles used in the final reconstruction. The particle distribution is indicated by different color shades. **b.** Local resolution of the map estimated using the ResMap program and colored as indicated. **c.** Sharpened cryo-EM density is displayed at the contour level  $8\sigma$  for JNJ-8003 binding region. The atomic model with side chains and JNJ-8003 were shown as sticks and colored in white and yellow, respectively. **d.** Fourier shell correlation (FSC) curve of the structure with FSC as a function of resolution using Relion output. The resolution is  $\sim 2.9$  Å at the FSC cutoff of 0.143. **e.** Model validation. Comparison of the FSC curves between model and half map 1 (work), model and half map 2 (free), and model and full map are plotted in red, green and magenta, respectively.

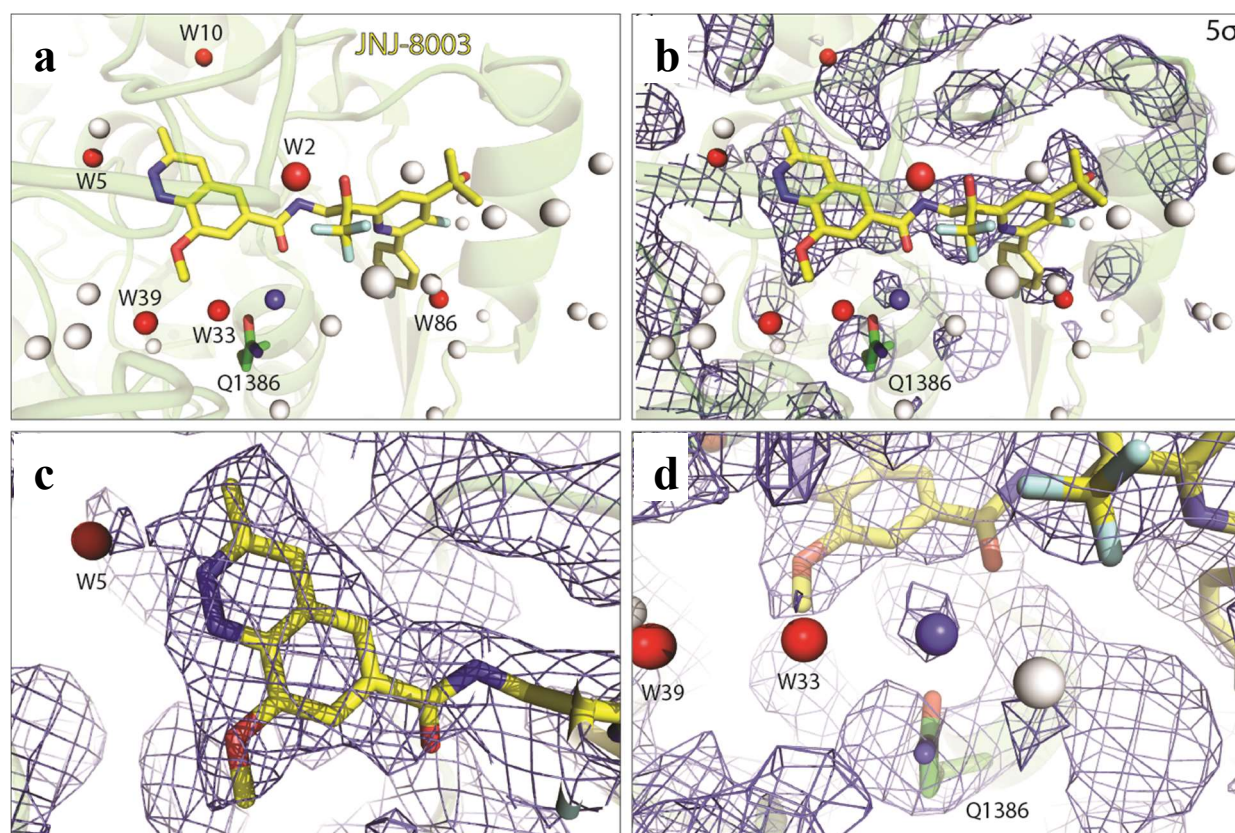

|     | $\Delta H$ | $-T\Delta S$ | $\Delta G$ | Occ  |
|-----|------------|--------------|------------|------|
| W2  | 0.15       | 6.19         | 6.34       | 1.00 |
| W33 | 2.88       | 2.36         | 5.24       | 0.63 |
| W39 | 2.78       | 1.96         | 4.74       | 0.58 |
| W5  | -0.38      | 5.05         | 4.67       | 0.98 |
| W86 | 3.24       | 1.04         | 4.28       | 0.35 |
| W10 | 0.97       | 4.14         | 4.11       | 0.89 |

**Supplementary Figure 10. Overlaying the WaterMap simulated water coordinates with the EM density map revealed that multiple non-connected EM densities may be ordered water molecules around JNJ-8003.** **a.** Simulated WaterMap water structure in a 5 Å contact sphere of JNJ-8003. RSV-L+P structure, JNJ-8003, and water cluster centroids are shown in cartoon, sticks, and spheres, respectively. One water molecule has the potential to bridge H-bonds between JNJ-8003 and Gln1386 and is highlighted in blue. Six high energy water molecules are labeled and in red. The table provides excess binding free energy contributions in kcal/mol and the occupancy (Occ) of the sites. **b.** Overlay of simulated WaterMap water molecules with the EM density map of JNJ-8003 bound RSV L+P complex. **c.** and **d.** Zoomed in views of high energy water molecules.

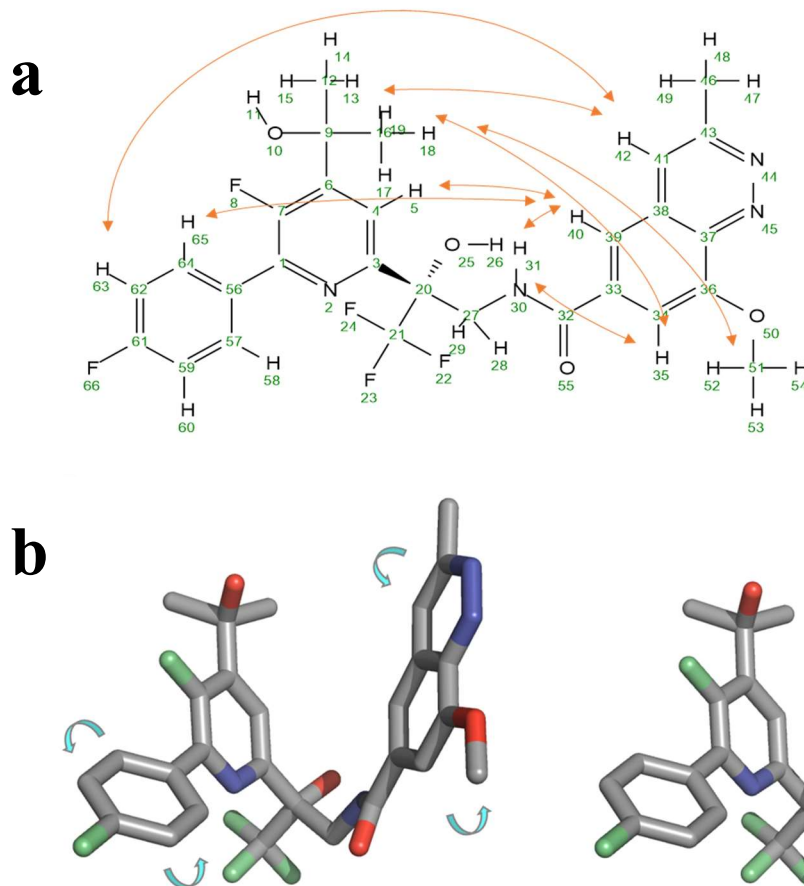

**Supplementary Figure 11: NMR characterization of JNJ-8003. a.** 2D structure of JNJ-8003 with arrows connecting the most relevant through-space NOE interactions observed in the ROESY spectra. **b.** 3D representation of the major NMR solution conformation of JNJ-8003, both conformers being equipopulated. Curved arrows represent the molecular parts showing free unhindered rotation in solution.

|       |                                                               |     |
|-------|---------------------------------------------------------------|-----|
| HRSVA | MDPI-----INGNS-ANVYLTDSYLKGVISFSECNAL-GSYIFNGPYLKNDYTNLI-SRQ  | 52  |
| HRSVB | MDPI-----INGNS-ANVYLTDSYLKGVISFSECNAL-GSYLFNGPYLKNDYTNLI-SRQ  | 52  |
| HMPV  | MDPL-----NEST-VNVYLPDSYLKGVISFSETNAI-GSCLLKRPYLKNDNTAKV-AIE   | 51  |
| PIV3  | MDTE-----SNGTVSDILYPECHLNSPIVKGKIAQLHTIMSLPQPYDMDDSDILVITRQ   | 55  |
| VSV   | MEVHDFETDEFNDFNEDDYATREFLNPDERM--TYLNHADYNLNSFLISDDIDNLIR---  | 55  |
|       |                                                               |     |
| HRSVA | NPLIEHMNLKLNITQSLISKYHKGEIKLEPTYF--QSLMITYKSMTSSEQIATTNLLK    | 110 |
| HRSVB | SPLLEHMNLKLTITQSLISRYHKGELKLEPTYF--QSLMITYKSMTSSEQIATTNLLK    | 110 |
| HMPV  | NPVIEHVRLLKNAVNSKMKISDY-----KIVEPVNM--QHEIMKNV-----HSCELTLK   | 98  |
| PIV3  | KI-----KLNKLDKRQRSIRRLK---LILTEKVNDLGKYTFIRYPEMSK-----        | 96  |
| VSV   | -----                                                         | 55  |
|       |                                                               |     |
| HRSVA | KIIRRAIEISDVKVYAI---LNKLGKLEKDKIKSNNGQEDNSVITTIKD---DILSAV    | 164 |
| HRSVB | KIIRRAIEISDVKVYAI---LNKLGKLEKDRVKNPNNSGDENSVLTTIID---DILSAV   | 164 |
| HMPV  | QFLTRSKNISTLKLNMI---CDWLQLKSTS-----DD-----                    | 127 |
| PIV3  | -----EMFKLHIPGINSKVTELLKADR-T-----YSQMTDGLRDLWINVLSKL         | 139 |
| VSV   | -----KFNSLPIPSMWDKSNWDGVLEMLTS-----CQ-ANPISTSQMHKMWGSWLS      | 101 |
|       |                                                               |     |
| HRSVA | KDNQSHLKADKNHSTKQKDTIKTTLKLLM-----CSMQHPPSW---LIHWFNL---Y     | 211 |
| HRSVB | ESNQSYTNSDKNHSVNQNIITIKTTLKLLM-----CSMQHPPSW---LIHWFNL---Y    | 211 |
| HMPV  | -----TSI--LSF-----IDVEFIPSW---VSNWFSN---W                     | 150 |
| PIV3  | ASKNDGSNYDLNEEINNISKVHTT-----YKSDKWYNPFKTWFTI---K             | 180 |
| VSV   | DNHASQGYSLHEVDKEAEITFDVVETFIRGWGNKPIEYIKKERWTDSEFKILAYLCQKF   | 161 |
|       |                                                               |     |
| HRSVA | TKLNNI-----LTQYRSN-EVKNHGFTLIDNQTLSGFQFILNQYGCIVYH            | 255 |
| HRSVB | TKLNNI-----LTQYRSN-EVKSHGFILIDNQTLSGFQFILNQYGCIVYH            | 255 |
| HMPV  | YNLNKL-----ILEFRKE-EVIRTGSILC--RSLGKLVFVVSSYGCIVKS            | 192 |
| PIV3  | YDMRRL-----QKA-RNE-VTFNMGKD-----YNLLEDQKNFLLIH                | 214 |
| VSV   | LDLHLKTLILNAVSEVELLNLRARTFKGKVRSSHGHTNICRIRVP-----SLGPTFIS    | 213 |
|       |                                                               |     |
| HRSVA | KELK-RITVTTYNQF-----LTWKDISLSRLNVCLIT--WISNCLNTLNKSLGLRCGF    | 305 |
| HRSVB | KGLK-KITTTTTYNQF-----LTWKDISLSRLNVCLIT--WISNCLNTLNKSLGLRCGF   | 305 |
| HMPV  | NKSK-RVSFFTTYNQF-----LTWKDVMSLRFNANFCI--WVSNLNLNENQEGGLRSNL   | 242 |
| PIV3  | PELVLILDKQNYNGYLITPELVLPYCDVVEGRWNI SACA--KLDPKLQSMY-----     | 263 |
| VSV   | EG---WAYFKKLDILMDPNFLMLVKDVIIGRMQTVLSMVCRIDNLFS-----EQ        | 259 |
|       |                                                               |     |
| HRSVA | NNVILTQLFLYGDICILKLFHNEGFIYIKEVEGFIMSLIILNITEEDQ---FRKRFYNSML | 361 |
| HRSVB | NNVLSQLFLYGDICILKLFHNEGFIYIKEVEGFIMSLIILNITEEDQ---FRKRFYNSML  | 361 |
| HMPV  | QGILTINKLYETVDYMLSLCCNEGFSLVKEFEFGFIMSEILRITEHAQ---FSTRFRNTLL | 298 |
| PIV3  | --QKGNLWEVIDKLPIMGEKTFDVISLLEPLALSIIQTHDPVKQ---LRGAFLNHVL     | 317 |
| VSV   | DIFSLNLIYRIGDKIVERQGNFSYDLIKMVEPICNLKLMKLARESRPLVPQFPFHENHIK  | 319 |
|       |                                                               |     |
| HRSVA | NNITDAANKAQKNLLSRVCHTLLDKTVSDNI INGRWIIILSKFLKLIKLAGDNNLNLSE  | 421 |
| HRSVB | NNITDAAIKAQKNLLSRVCHTLLDKTVSDNI INGWIIILSKFLKLIKLAGDNNLNLSE   | 421 |
| HMPV  | NGLTDQLTKLKNRRLRVHGTVLENN--DYPMYEVVLKLLGDTLRCIKLLINKNLNAE     | 356 |
| PIV3  | SEMELIFESR-----ESIK-----E-----FLSVDYIDKILDIFNKSTIDEIAE        | 356 |
| VSV   | TSVDEGAKI-----D---RGIRF--L-----HDQIMSVKTVDLTLV                | 350 |
|       |                                                               |     |
| HRSVA | LYFLFRIFGHPMVERQAMDAVKINCNETKFFYLLSSLSMLRGAFIYRII-KGFVN-----  | 475 |
| HRSVB | LYFLFRIFGHPMVERQAMDAVRINCNETKFFYLLSSLSMLRGAFIYRII-KGFVN-----  | 475 |
| HMPV  | LYYIFRIFGHPMVERDAMDAVKLNNEITKILRWESLTELRGAFILRII-KGFVD-----   | 410 |
| PIV3  | IFSFFRTFGHPPLEASIAAEKVRKYMYIGKQLKFDTINKCHAI FCTIII-NGYRE----- | 410 |
| VSV   | IYGSFRHWGHPFIDYYTGLEKLSHQVTMKKIDIVSYAKALASDLARIVLFQQFNDHKKWF  | 410 |

HRSVA -----N-YNRWPTLRNAIVLPLRWLTYKLNTPSLELTE----RDLIV 515  
 HRSVB -----T-YNRWPTLRNAIVLPLRWLNYYKLNTPSLELTE----NDLII 515  
 HMPV -----N-NKRWPKIKNLKVLKRWMTMYFKAKSYPSQLELSE----QDFLE 450  
 PIV3 -----RHGGQWPVPTLPDHA-----HEFIINAYGSNSAISYENAVDYYQS 450  
 VSV VNGDLLPHDHPFKSHVKENTWPTAAQVQDFGDKWHE----- 446

HRSVA LSGLRFYREFRFLPKKVDLEMIINDKAI SPPKNLIWTSFPRNYMPSHIQNYIEHEKLFSE 575  
 HRSVB LSGLRFYREFHFLPKKVDLEMIINDKAI SPPKDLIWTSFPRNYMPSHIQNYIEHEKLFSE 575  
 HMPV LAAIQFEQEFVPEKTNLEMVLNDKAI SPPKRLIWSVYPKNYLPEKIKNRYLEETFNASD 510  
 PIV3 FIGIKFNKFIEPQLDEDLTIYMKDKALSPPKSNWDTVSPASN-----LLYRTNA 499  
 VSV ---LPLIKCFEIPDLLDPSIIYSHKSHSMNRSE-----VLKHVRMNPNT 487

HRSVA SDKSRRVLEYLDRDNKFNECDLYNCVVNQSYLNNPNHVSLTGKERELS-VGRMFAMQPG 634  
 HRSVB SDRSRRVLEYLDRDNKFNECDLYNCVVNQSYLNNPNHVSLTGKERELS-VGRMFAMQPG 634  
 HMPV SLKTRRVLEYLDRDNKFQKELKSYVVKQEYLNDKDHIVSLTGKERELS-VGRMFAMQPG 569  
 PIV3 SNESRRLVEKFIADSKFDPNQILDYVESGDWLDPEFNISYSLKEKEIKQEGRLFAKMTY 559  
 VSV PIPSKKVLQTMMLDTKATNWKFLK-EIDEKGLDDDDLIIGLKGKERELKLAGRFFSLMSW 546

HRSVA MFRQVQILAEKMAIENILQFFPESLTRYGDLELQKILELKAGISNKSNRNDNYNN---- 690  
 HRSVB MFRQIQILAEKMAIENILQFFPESLTRYGDLELQKILELKAGISNKSNRNDNYNN---- 690  
 HMPV KQRQIQILAEKLLADNIVFFFPETLTKYGDLDLQRIEIKSELSSIKTRRNDSYNN---- 625  
 PIV3 KMRATQVLSLANNIGKFFQENGMVKGEIELKRLTTIS--ISGVPRYNEVYNNKSKSH 617  
 VSV KFPEYFVITEYLIKTHFVPMFKGLTMADDLTAVIKKMLDSS-SGQGLKSYE----- 596

HRSVA -----YISKCSIIITDLSKFNQAFRYETSC 714  
 HRSVB -----YISKCSIIITDLSKFNQAFRYETSC 714  
 HMPV -----YIARASIVTDLSKFNQAFRYETTA 649  
 PIV3 TDDLKTYNKISNLNLSSNQSKKFEFKSTDIYNDGYETVSCFLTDLKKYCLNWRYESTA 677  
 VSV -----A-----ICIANHIDYEKWNHQRKLSNG 619

HRSVA ICSDVLDLHGVQSLFSLWHLTIIPHVTI ICTYRHAPPYIGDHIIDLNNVDEQSGLY-RYH 773  
 HRSVB ICSDVLDLHGVQSLFSLWHLTIPLVTI ICTYRHAPPFIKDHVVNLNEVDEQSGLY-RYH 773  
 HMPV ICADVADELHGTSQSLFCWLHLIVPMTTMCAYRHAPPETKG-EYDIDKIEEQSGLY-RYH 707  
 PIV3 LFGETCNQIFGLNKLFWLHPRELGSTIYVGDYPCPPSDKEHISLEDH--PDSGFYVHNP 735  
 VSV PVFRVMGQFLGYPSLIERTHEFFEKSLIYNGR--PDLMRVHNNTLININSTSQP-VCWQQQ 676

HRSVA MGGIEGWCQKLWTIEAISLLDLISLKGKFSITALINGDNQSIDISKPIRLMEGQ-THAQA 832  
 HRSVB MGGIEGWCQKLWTIEAISLLDLISLKGKFSITALINGDNQSIDISKPVRLIEGQ-THAQA 832  
 HMPV MGGIEGWCQKLWTIEAISLLDVSVKTRCQMTSLINGDNQSIDVSKPVKLESEGL-DEVKA 766  
 PIV3 RGGIEGFCQKLWTLISISAIHLAAVRIGVRVTAMVQGDNQAI AVTTRVPNNYDVRVKEI 795  
 VSV EGGLEGLRQKGTILNLLVIQREAKIRNTAVKVL AQGDNQVIC TQYKTKKSRNV-VELQG 735

HRSVA D----YLLALNSLKLKYKEYAGIGHKLKGTETYISRDMQFMSKTIQHNGVYYPASIKKVL 888  
 HRSVB D----YLLALNSLKLKYKEYAGIGHKLKGTETYISRDMQFMSKTIQHNGVYYPASIKKVL 888  
 HMPV D----YSLAVKMLKEIRDAYRNI GHKLKEGETYISRDLQFISKVIQSEGMHPTPIKKIL 822  
 PIV3 V----YKDVVVFFDSLREVMDDLGHKLNETIISKMFYISKRIYYDGRILPQALKALS 851  
 VSV ALNQMVSNNEKIMTAIKIGTKLGLLINDDETMQSADYLNKGIPIFRGVIRGLETKRWS 795

HRSVA RVGPWINTILDDFKVSLESIGSLTQELEYRGESL----LCSLIFRNV-WLYNQIALQLKN 943  
 HRSVB RVGPWINTILDDFKVSLESIGSLTQELEYRGESL----LCSLIFRNI-WLYNQIALQLRN 943  
 HMPV RVGPWINTILDDIKTSAESIGSLCQELEFRGESI----IVSLILRNF-WLYNLYMHESKQ 877  
 PIV3 RCVFWSSETVIDETRASSNLA TSFAKAIENGYSFVLGYACS-IFKNIQQLYIALGMN--- 907  
 VSV RVTCVTNDQIPTCANIMSSVSTNALTVAHFAENPINAMIQYNYFGTFARL-----LLMM-H 850



|       |                                                               |      |
|-------|---------------------------------------------------------------|------|
| HRSVA | RTEDFLTEAIVHSVFIILSYTTHDLKDKLQDLSDDRLNKFLTCIITFDKNPNAEFVTLMR  | 1059 |
| HRSVB | RTEDFLTEAIVHSVFLSYTGHDLQDKLQDLSDDRLNKFLTCVITFDKNPNAEFVTLMR    | 1059 |
| HMPV  | RTEDFLTEAISHVDILLRISAN-----IRNEAKISFFKALLSIEKNERATLTLMR       | 984  |
| PIV3  | NIGDPSVAALADIKRFI----K-----ANLLDRSVLYRIMNQEPGESSFLDWAS        | 996  |
| VSV   | AEDPVTELSLSSWRFIVHVARSEHLKEMSAVFGNPEIAKFR-----ITHIDKLV        | 948  |
|       |                                                               |      |
| HRSVA | DPQALGSERQAK----ITSEINRLAVTEVLSTAPNKIFSKSAQHYTTT-EIDLNDIMQNI  | 1114 |
| HRSVB | DPQALGSERQAK----ITSEINRLAVTEVLSIAPNKIFSKSAQHYTTT-EIDLNDIMQNI  | 1114 |
| HMPV  | DPQAVGSERQAK----VTSIDINRTAVTSILSLSPNQLFSDSAIHYSRN-EEVGIADNI   | 1039 |
| PIV3  | DPYCNLPQSQN----ITTMIKNITARNVLQDSPNPLLSGLFTNTMIEEDEELAEFLMDR   | 1052 |
| VSV   | DPTSLNIAMGMSPANLLKTEVKKCLIE-SRQTIRNQVI-KDATIYLYHEEDRLRSFLWSI  | 1006 |
|       |                                                               |      |
| HRSVA | EPTYPHGLRVVYESLPFYKAEKIVNLSIGTKSITNILEKTSALDITDIDRATE---MM--  | 1169 |
| HRSVB | EPTYPHGLRVVYESLPFYKAEKIVNLSIGTKSITNILEKTSALDITDINRATD---MM--  | 1169 |
| HMPV  | TPVYPHGLRVLYESLPFHKAQKVVNMISIGTKSITNLLQRTSAINGEDIDRAVS---MM-- | 1094 |
| PIV3  | KVILPRVAHDILDN----SLTGIRNAIAG-----MLDITKSLIRVGINRGGGLTYSLLRK  | 1102 |
| VSV   | NPLFRFLSEFKSGTFLGVPDGLISLFQNSRTIRNSFKKKYH-----RELDLIVR--      | 1057 |
|       |                                                               |      |
| HRSVA | -----RKNITLLIRILPLDCNRDKREILSMENLSITELSKYVRERSWSLSN----IVGVT  | 1220 |
| HRSVB | -----RKNITLLIRILPLDCNKDKRELLSLENLSITELSKYVRERSWSLSN----IVGVT  | 1220 |
| HMPV  | -----LENLGLLSRILSVVDSIEIPTKSNRGLICQISRTLRETSWNNME----IVGVT    | 1145 |
| PIV3  | ISNYDLVQYETLSRTLRLIVS---DKIRYEDMCSVDLAIALRQKMWIHLSGGRMISGLE   | 1158 |
| VSV   | -----SEVSSLTHLGLKHLR---RGSCKMWTCSATHADTLRYKSWG-----RTVIGTT    | 1102 |
|       |                                                               |      |
| HRSVA | SPSIMYTMDI-KYTTSTIS-----SGIIIEKYNVNSLTRGERGPTKPVVGGSS         | 1266 |
| HRSVB | SPSIMFTMDI-KYTTSTIA-----SGIIIEKYNVNSLTRGERGPTKPVVGGSS         | 1266 |
| HMPV  | SPSITCMDV-IYATSSHL-----KGIIIEKFSTDRTRGQRPKSPVGGSS             | 1191 |
| PIV3  | TPDPLELLSGVITGSEHCKICYSSDGTNPYTWMLPGNIKIGSAETGISSLRVPTVGGSS   | 1218 |
| VSV   | VPHPLEMLGP-QHRKETPCAPCNTSGF--NYVSVHCPDGI---HDVFSSRGLPAYLGSK   | 1156 |
|       |                                                               |      |
|       | η17                                                           |      |
| HRSVA | TQEKKTMPV-YNRQVLTKKQRDQIDLLAKLDWVYASIDNKDEFMEELSIGTLGLTYEKAK  | 1325 |
| HRSVB | TQEKKTMPV-YNRQVLTKKQRDQIDLLAKLDWVYASIDNKDEFMEELSTGTLGLSYEKAK  | 1325 |
| HMPV  | TQEKKLVPV-YNRQILSKQREQLEAIGKMRWVYKGTPLRLLNKICLGLSGLISYKCVK    | 1250 |
| PIV3  | TDERSEAQL-GYIKNLSKPAKAAIRIAMIYTWAFGNDEISWMEASQIAQTRANFTLDSLK  | 1277 |
| VSV   | TSESTSILOPWERESKVPLIKRATRLRDAISWFVEPDSKLAMTILSNIHSLTGEWTKRQ   | 1216 |
|       |                                                               |      |
| HRSVA | KLFPQYLSVNYLHRLTVSSRP-CEEPASIPAYRTTNYHFDTSPIINRILTEKYGDEDIDIV | 1384 |
| HRSVB | KLFPQYLSVNYLHRLTVSSRP-CEEPASIPAYRTTNYHFDTSPIINRILTEKYGDEDIDIV | 1384 |
| HMPV  | PLLPREFMSVNFHRLTVSSRP-MEEPASVPAYRTTNYHFDTSPIINQALSERFGNEDINLV | 1309 |
| PIV3  | ILTPVATSTNLSERLKDTRDQ-MKESSTSLI-RVS-RFITMSNDNMSIKEANETKDTNLI  | 1334 |
| VSV   | HGF--KRTGSALHFRFSTSRMSHGGSASQSTA-ALT-RLMA---ITDITMRDLGDQNEDFI | 1268 |
|       |                                                               |      |
|       | α53                                                           |      |
| HRSVA | EONCISFGLSILMSVVEQFTNVCNRIILIPKLEIHLMKPPIFTGDVDIHKLKQVIQKQ-   | 1443 |
| HRSVB | EONCISFGLSILMSVVEQFTNICPNRIILIPKLEIHLMKPPIFTGDVDIHKLKQVIQKQ-  | 1443 |
| HMPV  | EONATSCGISILMSVVEQLTGRSPKQLVLIPLQLEEIDIMPPPVFQGFNYKLVDKITSDQ- | 1368 |
| PIV3  | YQCIMLTGLSVFEYLFRLLETTGHNPIVM---HLHIEDECCI-----KESFNDE-       | 1380 |
| VSV   | EQATLLYAQ-----ITTVARDGWITSDTHYHIAKSCSLRPIE-----EITLDDS        | 1314 |
|       |                                                               |      |
|       | α54                                                           |      |
| HRSVA | -HMFLDPKISLTQYVEL---FLSNKTLKSGSHVNS---NLILAHKISDYFHNTYI---L   | 1492 |
| HRSVB | -HMFLDPKISLTQYVEL---FLSNKALKSGSNINS---NLILVHKMSDYFHNAYI---L   | 1492 |
| HMPV  | -HIFSPDKIDMLTLGKM---LMPTIKG-----QK---TDQFLNKRENYFHGNLLIESL    | 1414 |
| PIV3  | -HINPESTLELIRYPESNEFIYDKDPLK-DVDLSKLMVIKDHYSYIDMNYWDDTDIIHAI  | 1438 |
| VSV   | MDYTPPDVSHVLKTV-----RNEGSGWQEIQK-----IYP-----                 | 1345 |

**Supplementary Figure 12: Alignment of the RdRp, and capping domain of multiple negative strand viruses.** The sequences have been aligned using ClustalW. Residues involved in the substrate binding are boxed. Conserved residues are highlighted and filled in red. RSV JNJ-8003 resistance mutations were indicated using gray spheres. Selected alpha helices were highlighted in green bars with the sequential IDs as in the paper <sup>4</sup>. Unresolved structural sequences were marked in gray for

emphasis.

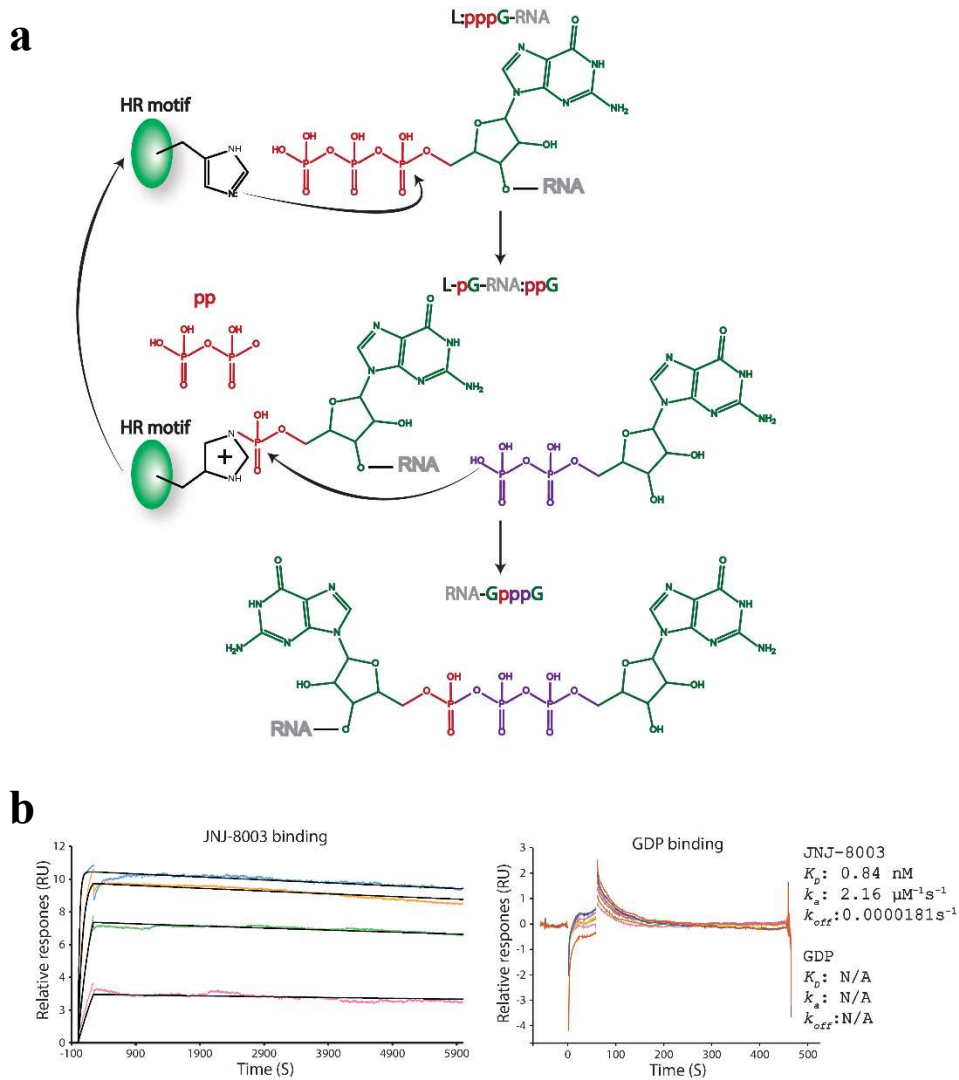

**Supplementary Figure 13: a.** proposed model of mRNA capping by RSV L protein. **b.** Binding experiments illustrating the interactions between RSV L+P complex with JNJ-8003 (Left panel) or GDP (Right panel).

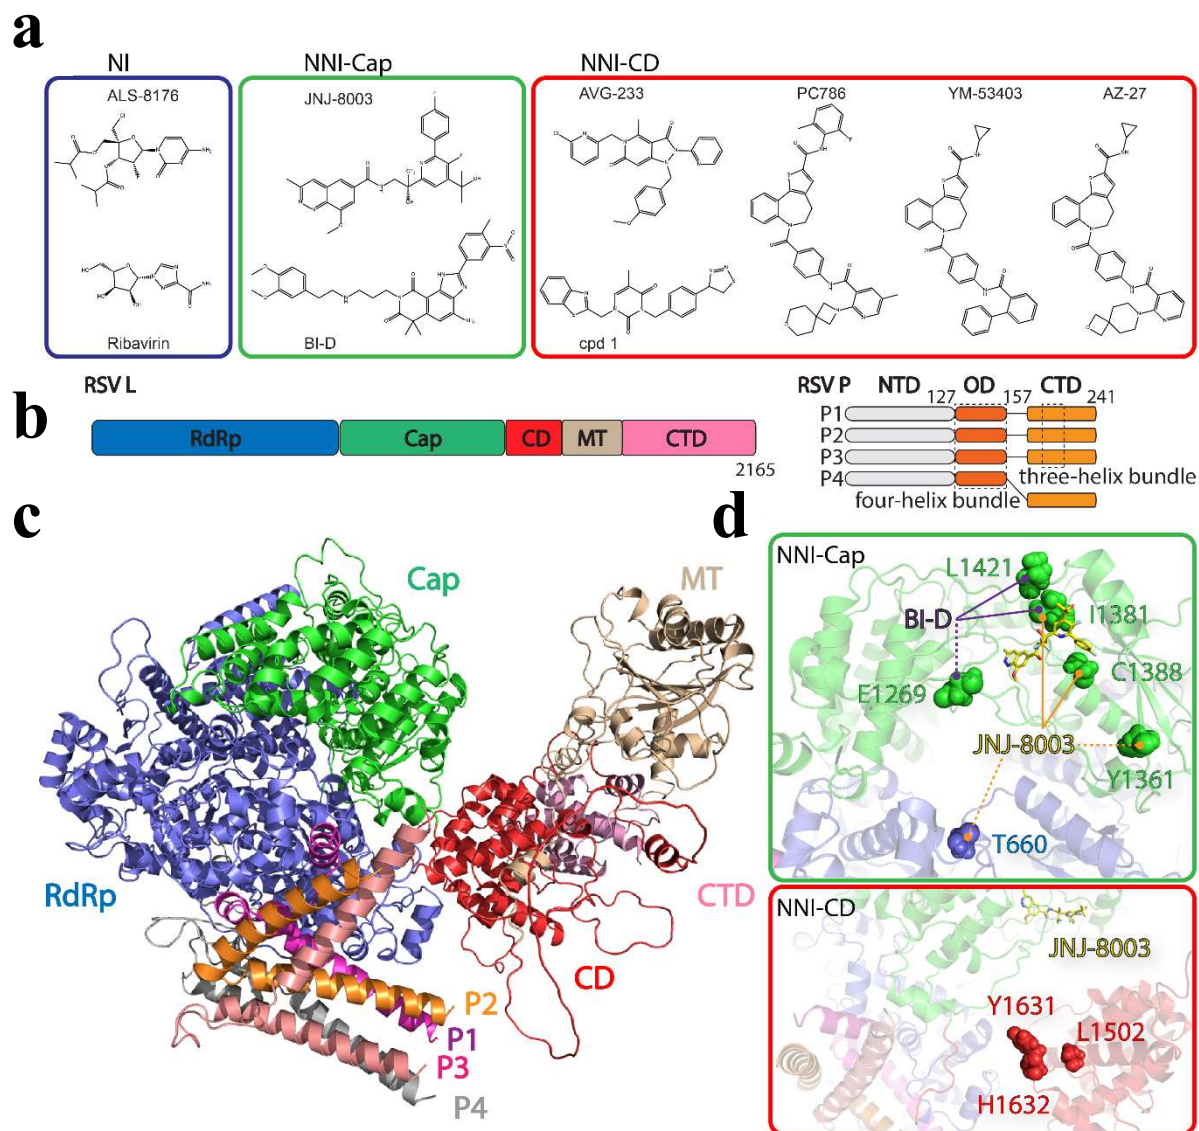

**Supplementary Figure 14. AlphaFold2 model of RSV L+P complex and resistance substitutions of inhibitors.** **a.** RSV polymerase inhibitors were categorized based on the specific target sites within RSV polymerase L protein. **b.** Schematic diagram of the architecture of RSV L+P with domains colored as indicated in Fig. A1. CD, MT, and CTD were colored in red, wheat, and pink, respectively. **c.** AlphaFold2 model of the full-length RSV L+P complex. The structures of RSV L (RdRp in blue, capping domain in green, CD in red, MT in light brown, and CTD in light pink), P1 (magenta), P2 (orange), P3 (pink), and P4 (white) were represented in cartoon. **d.** Zoom-in views of resistance substitutions of inhibitors which were mapped to the AlphaFold2 model. Resistance profiles for BI-D and JNJ-8003 were highlighted in purple and orange lines, respectively. Long-range effects were depicted using dashed lines. JNJ-8003 (yellow) was represented in sticks. Side chains of the key residues were shown in spheres.

## Supplementary References

- 1 Paesen, G. C. *et al.* X-ray structure and activities of an essential Mononegavirales L-protein domain. *Nat Commun* **6**, 8749, doi:10.1038/ncomms9749 (2015).
- 2 Jin, Z. *et al.* Structure-activity relationship analysis of mitochondrial toxicity caused by antiviral ribonucleoside analogs. *Antiviral Res* **143**, 151-161, doi:10.1016/j.antiviral.2017.04.005 (2017).
- 3 Hallak, L. K., Spillmann, D., Collins, P. L. & Peeples, M. E. Glycosaminoglycan sulfation requirements for respiratory syncytial virus infection. *J Virol* **74**, 10508-10513, doi:10.1128/jvi.74.22.10508-10513.2000 (2000).
- 4 Gilman, M. S. A. *et al.* Structure of the Respiratory Syncytial Virus Polymerase Complex. *Cell* **179**, 193-204 e114, doi:10.1016/j.cell.2019.08.014 (2019).
