# Supplementary material for: Structural and mechanistic insights into the inhibition of respiratory syncytial virus polymerase by a non-nucleoside inhibitor
Source: PubMed Central journal article supplement (PMC10590419; doi:10.1038/s42003-023-05451-4), 2023-10-21
Supplement: 42003_2023_5451_MOESM2_ESM.pdf [file 42003_2023_5451_MOESM2_ESM.pdf]

## Description of Additional Supplementary Files

**File name:** Supplementary Data 1

**Description:** Data points for Figure 1c

**File name:** Supplementary Data 2

**Description:** Original gel for Figure 1d

**File name:** Supplementary Data 3

**Description:** Original gel for Figure 2a

**File name:** Supplementary Data 4

**Description:** Original gel for Figure 2b

**File name:** Supplementary Data 5

**Description:** Data points and original gel for Figure 2c

**File name:** Supplementary Data 6

**Description:** Data points and original gel for Figure 2d

**File name:** Supplementary Data 7

**Description:** Data points and original gel for Figure 2e

**File name:** Supplementary Data 8

**Description:** Data points and original gel for Figure 2f

**File name:** Supplementary Data 9

**Description:** Data points and original gel for Figure 2g

**File name:** Supplementary Data 10

**Description:** Data points and original gel for Figure 2h

**File name:** Supplementary Data 11

**Description:** Data points for Supplementary Figure 1b

**File name:** Supplementary Data 12

**Description:** Data points for Supplementary Figure 1c

**File name:** Supplementary Data 13

**Description:** Data points for Supplementary Figure 5

**File name:** Supplementary Movie 1

**Description:** Morph between Apo (PDBID: 6PZK) and JNJ-8003 bound RSV L+P structures, visualizing the potential conformational changes upon JNJ-8003 binding. RSV L+P and JNJ-8003 were shown as cartoon, and sticks, respectively. The side chains of key residues involving in the binding process were shown in sticks.
